# Supplementary material for: Isolating the Primary Drivers of Fire Risk to Structures in WUI regions in California
Source: Research Square preprint supplement (doi:10.21203/rs.3.rs-5776626/v1), 2025-02-13
Supplement: Supplementary file 1 [file cf40546af20f71f042cbeb80.docx]

**Isolating the Primary Drivers of Fire Risk to Structures in WUI regions in California**

Maryam Zamanialaei1, Daniel San Martin2, Maria Theodori1, Dwi Marhaendro Jati Purnomo1, Ali Tohidi3, Chris Lautenberger4, Yiren Qin5, Arnaud Trouvé5, Michael Gollner1

1 Department of Mechanical Engineering, University of California, Berkeley, USA

2 Departamento de Informática, Universidad Técnica Federico Santa María, Valparaíso, Chile

3 Department of Mechanical Engineering, San Jose State University, San Jose, USA

4 CloudFire Inc., 985 Lincoln Way, Suite 207 Auburn, CA 95603, USA

5 Department of Fire Protection Engineering, University of Maryland, College Park, MD 20742, USA

# **Supplementary Materials**

We employed several classification models to analyze the Stacked WUI data and individual fires. In this section, we present the results of the Logistic Regression and Random Forest models applied to the Stacked WUI data and individual fires. Each of these models provides unique advantages and approaches for evaluating feature contributions through SHAP values. The results of the Logistic Regression (Figure S1) and the Random Forest (Figure S2) are shown below.


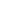


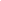


**Figure S1- SHAP results with Logistic Regression**

**
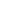
**


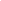


**Figure S2- SHAP results with Random Forest**

The ROC Curves and Confusion Matrices for the XGBoost model applied to the five fires are shown in Figure S3. The ROC Curves provide insight into the model's ability to discriminate between different classes, with the area under the curve (AUC) serving as a measure of its overall performance. The Confusion Matrices offer a detailed breakdown of the model’s predictions, highlighting the number of true positives, false positives, true negatives, and false negatives for each fire scenario.


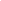


**Figure S3- ROC Curves and Confusion Matrices for the XGBoost model**

Figures S4-S7 illustrate the results of different mitigation strategies tested using our model, which examines the impact of home hardening and defensible space clearing on structure loss and survivability. In the No-Mitigation Scenario (Figure S4), structure loss is 80%, with a survivability rate of 20%. In Scenario 1 (Figure S5), home hardening measures, including non-flammable siding, fine mesh over vents, and non-flammable roofs, were applied. This resulted in a 25% survival rate and 75% structure loss. Scenario 2 (Figures S6) combined home hardening with clearing defensible space in Zone 0 (0-5 feet), which improved the survival rate to 40% and reduced structure loss to 60%. Finally, in the extreme mitigation scenario (Figures S7), both home hardening and defensible space clearing in Zones 0 (0-5 feet) and 1 (5-30 feet) were implemented, leading to a 48% survival rate and a 52% reduction in structure loss.

**
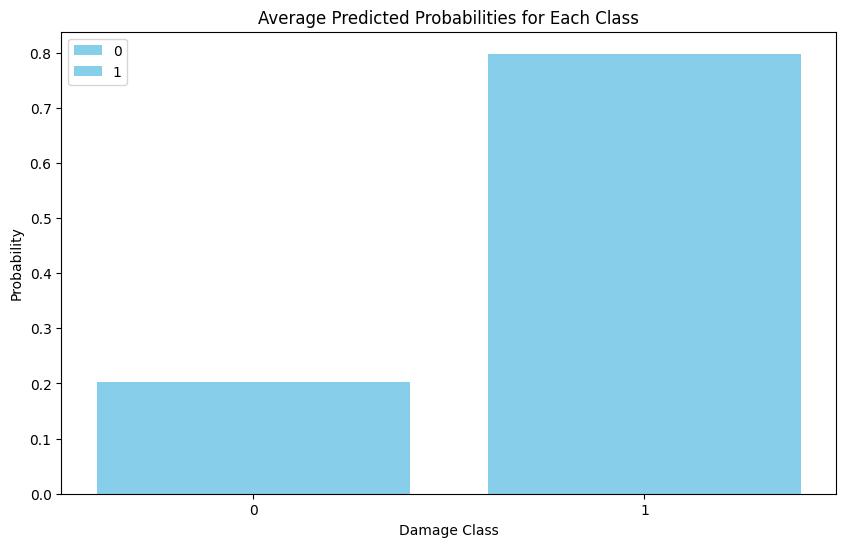
**

**Figure S4- Predicting probabilities of structural destruction for entire WUI data**

**
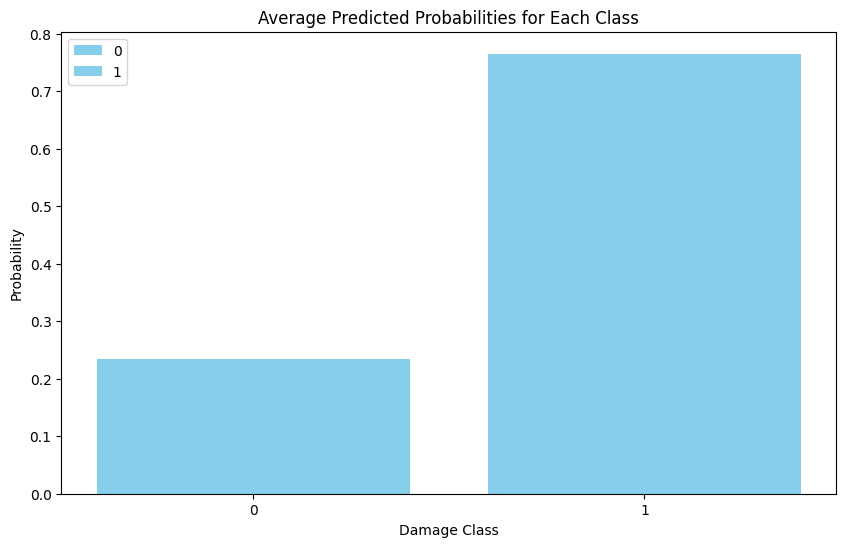
**

**Figure S5- Predicting probabilities of structural destruction with home hardening scenario**

**
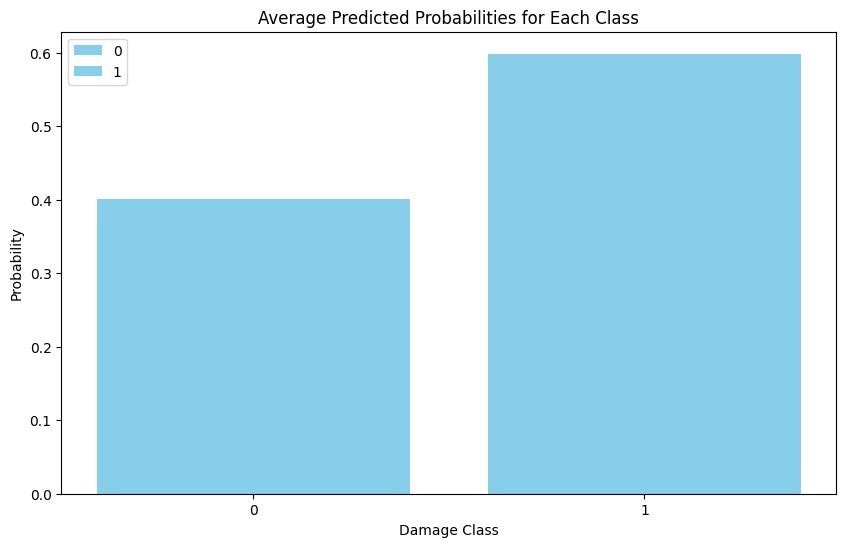
**

**Figure S6- Predicting probabilities of structural destruction with home hardening and defensible space (clearing Zone 0)**

**
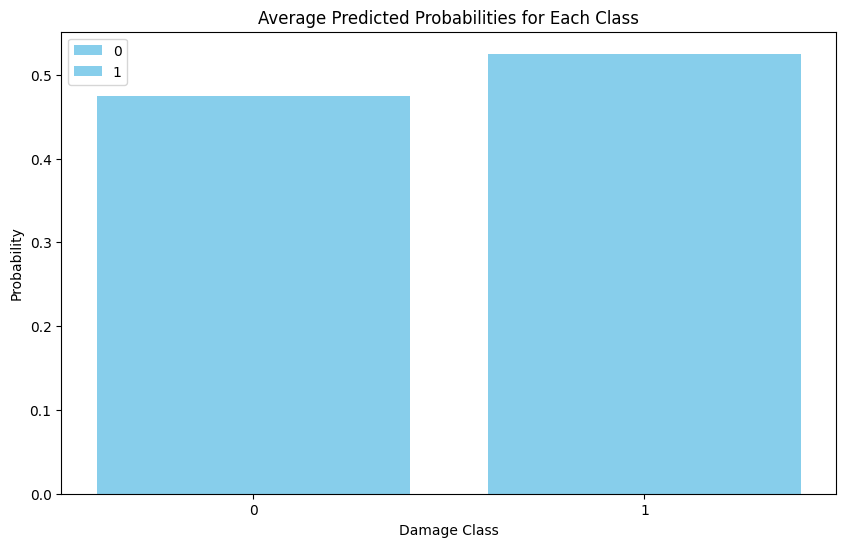
**

**Figure S7- Predicting probabilities of structural destruction with home hardening and defensible space (clearing Zone 0 and Zone 1)**
